# Supplementary material for: Association between Albumin–Globulin Ratio and Mortality in Patients with Chronic Kidney Disease
Source: MDPI journal article supplement (doi:10.3390/jcm8111991), 2019-11-15
Supplement: s1 [file s1]

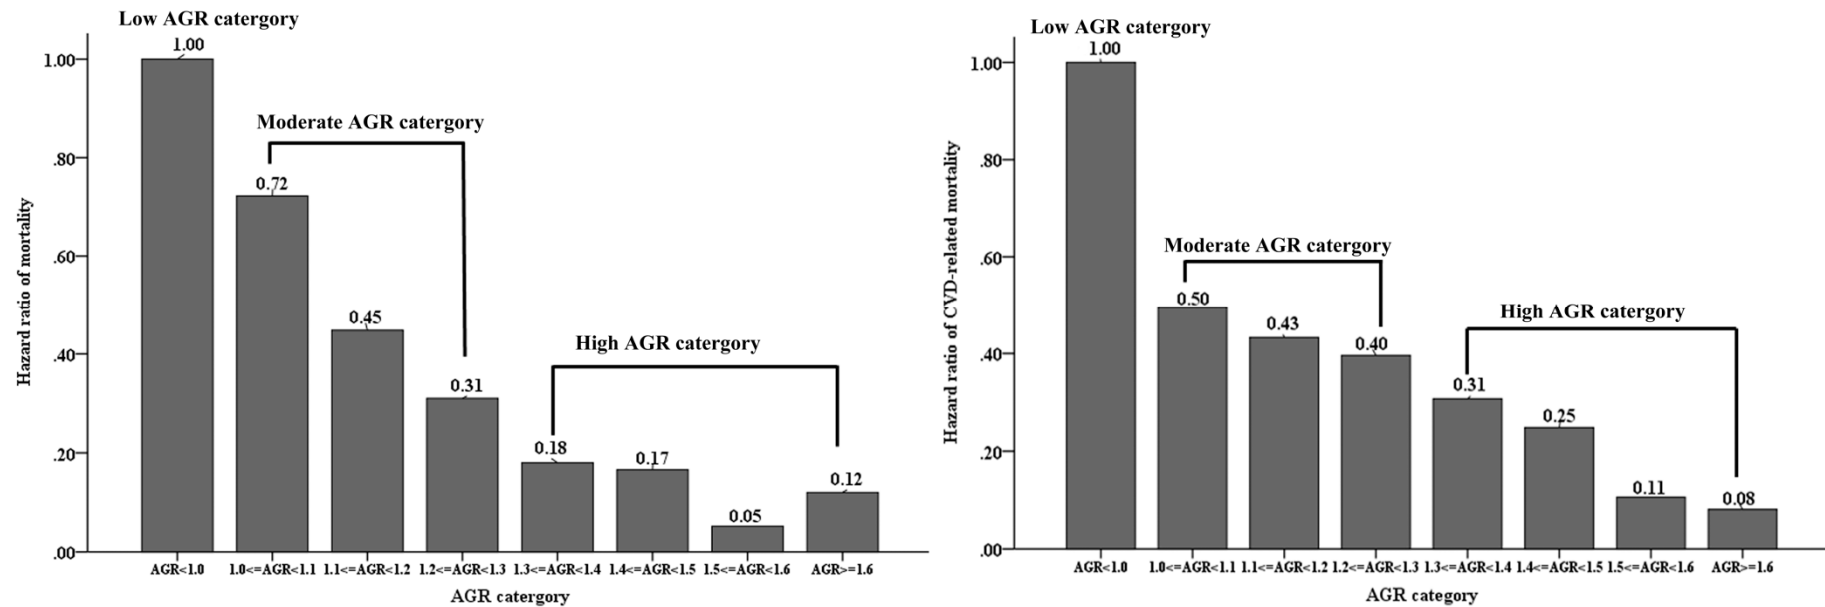

**Figure S1.** The study population was classified as low, moderate, or high AGR groups based on similar magnitudes of mortality risk.
